# Supplementary material for: Ontogenetic expression of thyroid hormone signaling genes: An in vitro and in vivo species comparison
Source: PLoS One. 2019 Sep 12;14(9):e0221230. doi: 10.1371/journal.pone.0221230 (PMC6742404; doi:10.1371/journal.pone.0221230)
Supplement: S1 Appendix — (XLSX) [file pone.0221230.s004.xlsx]

## Sheet: hNPC, hbrain
Sample	DIO2 Ct	β-Actin Ct	DIO3 Ct	β-Actin Ct	LAT1 Ct	β-Actin Ct	LAT2 Ct	β-Actin Ct	MCT8 Ct	β-Actin Ct	OATP1c1 Ct	β-Actin Ct	TRα1 Ct	β-Actin Ct	TRα2 Ct	β-Actin Ct	TRβ Ct	β-Actin Ct	KLF9 Ct	β-Actin Ct	MBP Ct	β-Actin Ct	NCOR1 Ct	β-Actin Ct	HR Ct	β-Actin Ct
Prol - Rep 1	26.9	8.85	27.06	8.85	17.85	8.85	28.79	8.85	17.45	8.85	18.56	8.85	18.42	8.85	16.46	8.85	24.05	10.04	19.42	9.21	n.a.	9.21	14.43	8.85	22.25	8.85
Prol - Rep 1	27.1	8.9	26.72	8.9	17.91	8.9	28.52	8.9	17.26	8.9	19.44	8.9	19.06	8.9	17.03	8.9	23.01	10.82	19.6	8.22	26.88	8.22	15.18	8.9	22.47	8.9
Prol - Rep 1	28.4	10.92	27.04	10.92	18.62	10.92	28.85	10.92	17.59	10.92	19.82	10.92	18.28	10.92	18.34	10.92	24.71	11.46	19.48	9.31	27.03	9.31	16.26	10.92	23.16	10.92
Prol - Rep 2	26.63	9.21	28.06	10.04	19.98	10.04	27.74	9.21	18.99	10.04	18.66	9.21	17.58	9.21	17.37	9.21	22.03	7.88	20.41	7.88	25.56	7.88	15.37	9.21	21.22	9.21
Prol - Rep 2	26.98	8.22	29.62	10.82	19.37	10.82	28.36	8.22	18.09	10.82	18.81	8.22	26.19	8.22	17.49	8.22	22.28	8.65	20.87	8.65	25.87	8.65	14.78	8.22	25.68	8.22
Prol - Rep 2	27.43	9.31	28.74	11.46	20.34	11.46	27.96	9.31	43.36	11.46	19.51	9.31	18.64	9.31	16.65	9.31	21.86	8.07	20.38	8.07	25.96	8.07	16.33	9.31	22.12	9.31
Prol - Rep 3	23.16	10.18	25.61	8.89	19.62	10.18	29.93	10.18	18.77	10.18	20.14	10.18	19.83	10.18	18.91	10.18	23.88	9.58	19.93	8.85	26.47	8.85	16.49	10.18	23.14	8.89
Prol - Rep 3	28.62	9.54	25.79	8.81	18.59	9.54	29.53	9.54	17.93	9.54	19.27	9.54	19.26	9.54	18.08	9.54	25.11	9.92	19.56	8.9	25.53	8.9	15.52	9.54	23.29	8.81
Prol - Rep 3	28.37	9.95	25.51	9.23	19.3	9.95	31.09	9.95	18.34	9.95	19.47	9.95	19.62	9.95	18.5	9.95	23.56	9.2	20.13	10.92	26.58	10.92	16.17	9.95	22.67	9.23
3d diff - Rep 1	27.6	11.67	28.08	10.72	20.36	10.72	27.6	10.72	18.47	10.72	19.1	10.72	20.47	11.67	16.52	10.21	25.6	11.67	22.74	10.72	28.12	10.72	16.7	10.97	24.28	10.72
3d diff - Rep 1	27.27	11.95	27.27	11.01	20.28	11.01	28.02	11.01	18.19	11.01	18.83	11.01	20.77	11.95	16.99	10.61	24.5	11.88	22.47	11.01	26.64	11.01	16.76	11.05	24.4	11.01
3d diff - Rep 1	27.39	13.21	27.66	10.81	19.68	10.81	27.01	10.81	17.87	10.81	18.81	10.81	22.63	13.21	17	10.03	25.23	11.61	22.59	10.81	27.19	10.81	16.53	11.12	24.16	10.81
3d diff - Rep 2	27.18	10.72	29.66	11.67	20.56	20.25	29.95	11.67	20.2	11.65	20.12	11.65	20.43	10.72	19.48	11.67	25.46	10.72	23.23	11.65	28.24	11.65	18.14	11.67	24.11	10.21
3d diff - Rep 2	28.77	11.01	28.98	11.95	20.06	11.69	29.48	11.88	20.53	12.06	20.59	12.06	20.43	11.01	18.53	11.95	25.52	11.01	23.93	12.06	28.55	12.06	18	11.88	24.4	10.61
3d diff - Rep 2	28.59	10.81	30.92	13.21	21.32	12.32	27.21	11.61	19.75	12.29	20.24	12.29	20.14	10.81	20.73	13.21	25.46	10.81	23.12	12.29	28.16	12.29	17.59	11.61	25.32	10.03
3d diff - Rep 3	26.75	13.02	26.79	10.21	22.45	13.02	28.14	11.67	19.92	13.02	21.32	13.02	21.41	13.02	20.43	13.02	25.98	10.97	24.53	13.02	28.1	10.9	18.38	13.02	27.18	13.02
3d diff - Rep 3	27.01	12.88	26.65	10.61	22.03	12.88	28.34	11.95	20.14	12.88	21.2	12.88	21.46	12.88	20.3	12.88	25.78	11.05	24.67	12.88	29.55	10.83	18.01	12.88	27.02	12.88
3d diff - Rep 3	26.51	13.43	26.78	10.03	22.5	13.43	n.a.	13.21	20.31	13.43	21.69	13.43	21.85	13.43	20.59	13.43	26.28	11.12	24.93	13.43	27.89	11.2	18.79	13.43	27.11	13.43
5d diff - Rep 1	27.45	11.71	30.9	11.71	19.46	10.45	25.6	10.45	19.51	11.71	21.22	11.71	20.51	11.71	16.73	10.45	25.81	11.71	21.84	10.45	22.69	9.8	16.15	10.45	25.51	11.71
5d diff - Rep 1	27.4	12.27	28.43	12.27	19.5	10.21	25.29	10.21	19.15	12.27	20.54	12.27	20.9	12.27	16.53	10.21	25.47	12.27	21.2	10.21	28.19	26.15	16.05	10.21	23.99	12.27
5d diff - Rep 1	28.15	11.37	27.72	11.37	19.52	9.96	26.15	9.96	n.a.	11.37	20.77	11.37	21.68	11.37	16.4	9.96	25.04	11.37	22.05	9.96	24.46	11.18	15.64	9.96	24.29	11.37
5d diff - Rep 2	27.25	10.01	25.58	10.45	21.44	11.71	26.15	10.01	17.65	10.01	19.6	10.01	17.95	10.01	16.35	10.01	25.44	12.12	22.75	10.01	22.64	10.01	17.29	11.71	25.13	12.12
5d diff - Rep 2	27.9	10.48	26.18	10.21	20.42	12.27	28.39	10.48	18.03	10.48	20.35	10.48	18.55	10.48	16.92	10.48	24.97	12.37	22.89	10.48	23.14	10.48	16.83	12.27	25.31	12.37
5d diff - Rep 2	27.65	10.37	26.31	9.96	20.95	11.37	26.45	10.37	17.8	10.37	19.35	10.37	18.4	10.37	16.46	10.37	26.09	13.22	22.56	10.37	23.15	10.37	16.97	11.37	26.41	13.22
5d diff - Rep 3	26.63	12.12	28.9	12.12	20.85	12.12	28.88	12.12	18.95	12.12	21.22	11.71	20.67	12.12	19.53	12.12	25.39	11.21	24.37	12.12	26.87	12.12	17.06	12.12	23.18	10.45
5d diff - Rep 3	27.35	12.37	29.25	12.37	20.98	12.37	29.51	12.37	18.96	12.37	20.54	12.27	20.64	12.37	19.19	12.37	27.03	11.37	24.13	12.37	26.08	12.37	17.32	12.37	25.31	10.21
5d diff - Rep 3	27.97	13.22	28.47	13.22	21.89	13.22	28.87	13.22	20	13.22	20.77	11.37	21.59	13.22	20.76	13.22	25.65	11.19	25.06	13.22	26.53	13.22	18.14	13.22	22.72	9.96
Brain - Rep 1	26.26	9.75	24.75	9.75	16.96	9.75	20.54	9.75	17.73	9.75	20.67	9.75	17.24	9.75	15.72	9.75	18.21	9.75	18.84	9.45	14.39	9.45	16.82	9.45	18.69	9.45
Brain - Rep 2	26.04	9.45	24.04	9.45	16.54	9.45	20.75	9.45	17.51	9.45	20.29	9.45	17.13	9.45	14.97	9.45	18.9	9.45	19.1	9.36	14.6	9.36	16.51	9.36	18.79	9.36
Brain - Rep 3	26.54	9.36	23.84	9.36	16.47	9.36	20.8	9.36	17.42	9.36	20.31	9.36	16.96	9.36	15.1	9.36	18.29	9.36	18.39	9.52	14.19	9.52	15.92	9.52	17.72	9.52
STANDARD CURVE DATA
Copy number	β-Actin Ct	DIO2 Ct	DIO3 Ct	LAT1 Ct	LAT2 Ct	MCT8 Ct	OATP1c1 Ct	TRα1 Ct	TRα2 Ct	TRβ Ct	KLF9 Ct	MBP Ct	NCOR1 Ct	HR Ct
375	20.8733	22.07	23.02	22.59	24.57	23.23	22.82	22.38	20.81	22.79	20.7	23.25	24.17	28.16
3750	17.2933	19.05	19.97	20.06	20.89	20.25	19.58	20.51	18.72	19.76	17.41	19.66	20.5	19.9
37500	14.1767	15.36	16.19	16.4	17.63	16.29	16.42	17.22	14.62	16.09	14.15	17.09	17.42	15.53
375000	10.5333	12.12	12.76	13.23	14.21	12.96	13.07	13.79	11.76	12.81	11.06	13.49	14.41	12.54
3750000	6.94	9.01	9.46	9.92	11	9.81	9.48	10.83	8.45	9.17	7.5	9.92	11.52	9.1
37500000	4.02333
Standard Curve Equation	y = -1.476ln(x) + 29.552	y = -1.435ln(x) + 30.639	y = -1.491ln(x) + 31.983	y = -1.397ln(x) + 31.155	y = -1.469ln(x) + 33.129	y = -1.482ln(x) + 32.119	y = -1.441ln(x) + 31.455	y = -1.295ln(x) + 30.586	y = -1.376ln(x) + 29.363	y = -1.485ln(x) + 31.763	y = -1.422ln(x) + 29.144	y = -1.426ln(x) + 31.699	y = -1.363ln(x) + 31.962	y = -1.537ln(x) + 32.224
Sample	Conc T3	DIO3 Ct	β-Actin Ct	Conc T4	DIO3 Ct	β-Actin Ct
Prol - Rep 1	0 T3	27.06	8.85	0 T4	27.06	8.85
Prol - Rep 1	0 T3	26.72	8.9	0 T4	26.72	8.9
Prol - Rep 1	0 T3	27.04	10.92	0 T4	27.04	10.92
Prol - Rep 2	0 T3	23.67	9.21	0 T4	23.67	9.21
Prol - Rep 2	0 T3	24.31	8.22	0 T4	24.31	8.22
Prol - Rep 2	0 T3	24.13	9.31	0 T4	24.13	9.31
Prol - Rep 3	0 T3	25.61	8.89	0 T4	25.61	8.89
Prol - Rep 3	0 T3	25.79	8.81	0 T4	25.79	8.81
Prol - Rep 3	0 T3	25.51	9.23	0 T4	25.51	9.23
Prol - Rep 1	30 fM T3	26.39	8.67	30 fM T4	26.12	8.37
Prol - Rep 1	30 fM T3	27.15	8.5	30 fM T4	26.82	8.76
Prol - Rep 1	30 fM T3	25.94	24.02	30 fM T4	26.38	8.87
Prol - Rep 2	30 fM T3	24.83	9.36	30 fM T4	23.76	8.42
Prol - Rep 2	30 fM T3	24	9.63	30 fM T4	24.08	8.16
Prol - Rep 2	30 fM T3	24.38	21.98	30 fM T4	24.23	9.04
Prol - Rep 3	30 fM T3	25.11	9.9	30 fM T4	25.83	8.92
Prol - Rep 3	30 fM T3	25.36	8.79	30 fM T4	26.04	8.99
Prol - Rep 3	30 fM T3	25.91	8.75	30 fM T4	24.46	9.43
Prol - Rep 1	30 pM T3	26.27	23.99	30 pM T4	26.68	8.76
Prol - Rep 1	30 pM T3	26.55	9.77	30 pM T4	26.64	8.67
Prol - Rep 1	30 pM T3	25.78	8.65	30 pM T4	26.4	9.15
Prol - Rep 2	30 pM T3	24.8	9.19	30 pM T4	24.16	9.19
Prol - Rep 2	30 pM T3	24.58	8.96	30 pM T4	23.85	8.24
Prol - Rep 2	30 pM T3	23.9	8.18	30 pM T4	23.7	8.97
Prol - Rep 3	30 pM T3	25.21	9.16	30 pM T4	25.52	9.59
Prol - Rep 3	30 pM T3	25.52	8.96	30 pM T4	25.28	9.04
Prol - Rep 3	30 pM T3	25.53	9.62	30 pM T4	25.5	9.51
Prol - Rep 1	3 nM T3	26.86	9.41	30 nM T4	24.8	9.25
Prol - Rep 1	3 nM T3	24.32	8.53	30 nM T4	24.01	9.61
Prol - Rep 1	3 nM T3	24.86	9.93	30 nM T4	24.17	8.58
Prol - Rep 2	3 nM T3	23.43	9	30 nM T4	22.82	8.97
Prol - Rep 2	3 nM T3	22.86	9.65	30 nM T4	23.33	9.3
Prol - Rep 2	3 nM T3	23.3	9.75	30 nM T4	22.3	9.04
Prol - Rep 3	3 nM T3	23.69	22.51	30 nM T4	23.47	9.61
Prol - Rep 3	3 nM T3	23.64	9.47	30 nM T4	23.29	23.05
Prol - Rep 3	3 nM T3	23.53	9.27	30 nM T4	23.59	9.25
3d diff - Rep 1	0 T3	29.66	11.67	0 T4	29.66	11.67
3d diff - Rep 1	0 T3	28.98	11.95	0 T4	28.98	11.95
3d diff - Rep 1	0 T3	30.92	13.21	0 T4	30.92	13.21
3d diff - Rep 2	0 T3	27.1	20.25	0 T4	27.1	20.25
3d diff - Rep 2	0 T3	29.27	11.69	0 T4	29.27	11.69
3d diff - Rep 2	0 T3	29.31	12.32	0 T4	29.31	12.32
3d diff - Rep 3	0 T3	26.79	10.21	0 T4	26.79	10.21
3d diff - Rep 3	0 T3	26.65	10.61	0 T4	26.65	10.61
3d diff - Rep 3	0 T3	26.78	10.03	0 T4	26.78	10.03
3d diff - Rep 1	30 fM T3	28.63	12.06	30 fM T4	30.2	20.21
3d diff - Rep 1	30 fM T3	30.07	12.43	30 fM T4	29.67	12.39
3d diff - Rep 1	30 fM T3	29.58	11.77	30 fM T4	29.89	12.66
3d diff - Rep 2	30 fM T3	31.75	12.28	30 fM T4	27.43	11.94
3d diff - Rep 2	30 fM T3	29.37	11.55	30 fM T4	26.04	11.49
3d diff - Rep 2	30 fM T3	29.32	11.92	30 fM T4	28.47	11.39
3d diff - Rep 3	30 fM T3	27.68	10.33	30 fM T4	26.81	11.44
3d diff - Rep 3	30 fM T3	26.86	10.11	30 fM T4	27.13	9.98
3d diff - Rep 3	30 fM T3	27.35	10.6	30 fM T4	26.05	10.69
3d diff - Rep 1	30 pM T3	24.37	11.48	30 pM T4	28.94	11.8
3d diff - Rep 1	30 pM T3	24.66	11.37	30 pM T4	27.68	11.44
3d diff - Rep 1	30 pM T3	24.78	11.98	30 pM T4	30.96	11.88
3d diff - Rep 2	30 pM T3	24.27	12.36	30 pM T4	27.52	13.25
3d diff - Rep 2	30 pM T3	24.41	12.23	30 pM T4	27.49	11.9
3d diff - Rep 2	30 pM T3	24.17	12.41	30 pM T4	27.67	12.23
3d diff - Rep 3	30 pM T3	22.49	10.49	30 pM T4	26.81	10.16
3d diff - Rep 3	30 pM T3	24.47	11.67	30 pM T4	26.37	11.07
3d diff - Rep 3	30 pM T3	23.1	10.1	30 pM T4	26.22	10.72
3d diff - Rep 1	3 nM T3	21.64	12.07	30 nM T4	22.76	12.35
3d diff - Rep 1	3 nM T3	21.2	12.61	30 nM T4	22.13	12.79
3d diff - Rep 1	3 nM T3	21.88	11.86	30 nM T4	30.18	11.87
3d diff - Rep 2	3 nM T3	32.47	11.87	30 nM T4	22.36	12.93
3d diff - Rep 2	3 nM T3	23.45	12.49	30 nM T4	21.95	12.04
3d diff - Rep 2	3 nM T3	21.67	11.61	30 nM T4	22.16	12.35
3d diff - Rep 3	3 nM T3	27.43	12.04	30 nM T4	20.48	10.75
3d diff - Rep 3	3 nM T3	19.46	9.96	30 nM T4	20.37	10.03
3d diff - Rep 3	3 nM T3	19.61	9.9	30 nM T4	19.56	10.36
5d diff - Rep 1	0 T3	30.9	11.71	0 T4	30.9	11.71
5d diff - Rep 1	0 T3	28.43	12.27	0 T4	28.43	12.27
5d diff - Rep 1	0 T3	27.72	11.37	0 T4	27.72	11.37
5d diff - Rep 2	0 T3	25.58	10.45	0 T4	25.58	10.45
5d diff - Rep 2	0 T3	26.18	10.21	0 T4	26.18	10.21
5d diff - Rep 2	0 T3	26.31	9.96	0 T4	26.31	9.96
5d diff - Rep 3	0 T3	26.4	10.01	0 T4	26.4	10.01
5d diff - Rep 3	0 T3	27.22	10.48	0 T4	27.22	10.48
5d diff - Rep 3	0 T3	27.17	10.37	0 T4	27.17	10.37
5d diff - Rep 1	30 fM T3	24.46	21.42	30 fM T4	26.32	12.18
5d diff - Rep 1	30 fM T3	29.7	12.69	30 fM T4	27.37	12.79
5d diff - Rep 1	30 fM T3	28.96	21.5	30 fM T4	26.81	11.84
5d diff - Rep 2	30 fM T3	25.14	9.95	30 fM T4	24.82	9.85
5d diff - Rep 2	30 fM T3	25.17	10.56	30 fM T4	24.99	10.26
5d diff - Rep 2	30 fM T3	24.77	9.8	30 fM T4	24.31	10.1
5d diff - Rep 3	30 fM T3	27.41	10.43	30 fM T4	26.63	10.17
5d diff - Rep 3	30 fM T3	27.66	9.8	30 fM T4	27.52	10.24
5d diff - Rep 3	30 fM T3	27.03	10.23	30 fM T4	27.05	10.12
5d diff - Rep 1	30 pM T3	22.4	11.26	30 pM T4	25.3	11.77
5d diff - Rep 1	30 pM T3	22.8	21.97	30 pM T4	25.47	22.03
5d diff - Rep 1	30 pM T3	24.71	13.62	30 pM T4	25.65	12.94
5d diff - Rep 2	30 pM T3	21.8	9.82	30 pM T4	23.64	10.29
5d diff - Rep 2	30 pM T3	21.47	9.95	30 pM T4	23.44	9.84
5d diff - Rep 2	30 pM T3	20.62	10.01	30 pM T4	24.84	9.98
5d diff - Rep 3	30 pM T3	22.57	10.35	30 pM T4	23.61	9.79
5d diff - Rep 3	30 pM T3	22.17	9.85	30 pM T4	23.42	9.71
5d diff - Rep 3	30 pM T3	21.91	10.36	30 pM T4	23.68	10.11
5d diff - Rep 1	3 nM T3	19.86	11.69	30 nM T4	19.86	12.03
5d diff - Rep 1	3 nM T3	19.55	11.24	30 nM T4	18.96	22.32
5d diff - Rep 1	3 nM T3	19.26	11.51	30 nM T4	18.78	11.11
5d diff - Rep 2	3 nM T3	16.36	10.33	30 nM T4	17.25	10.38
5d diff - Rep 2	3 nM T3	18.62	10.79	30 nM T4	17.62	10.68
5d diff - Rep 2	3 nM T3	18.35	10.49	30 nM T4	17.65	9.92
5d diff - Rep 3	3 nM T3	17.87	10.34	30 nM T4	17.37	9.69
5d diff - Rep 3	3 nM T3	17.85	9.95	30 nM T4	17.84	10.32
5d diff - Rep 3	3 nM T3	18.49	10.77	30 nM T4	17.57	10.19

## Sheet: rNPC, rbrain
Sample	dio2 Ct	β-Actin Ct	dio3 Ct	β-Actin Ct	lat1 Ct	β-Actin Ct	lat2 Ct	β-Actin Ct	mct8 Ct	β-Actin Ct	oatp1c1 Ct	β-Actin Ct	trα1 Ct	β-Actin Ct	trα2 Ct	β-Actin Ct	trβ Ct	β-Actin Ct	klf9 Ct	β-Actin Ct	mobp Ct	β-Actin Ct	ncor1 Ct	β-Actin Ct	hr Ct	β-Actin Ct
Prol - Rep 1	18.82	10.41	28.56	10.86	17.6	10.41	19.5	10.41	16.99	10.41	21.26	10.41	20.56	10.86	17.97	10.41	20.76	10.41	17.75	10.41	21.42	10.41	14.75	10.41	20.35	10.41
Prol - Rep 1	16.91	10.69	29.58	11.56	19.39	10.69	20.3	10.69	19.12	10.69	23.47	10.69	22.18	11.56	19.77	10.69	23.44	10.69	15.63	10.69	21.4	10.69	15.98	10.69	20.99	10.69
Prol - Rep 1	17.36	10.58	38.98	11.11	16.59	10.58	18.6	10.58	16.36	10.58	20.69	10.58	21.99	11.11	17.53	10.58	20.31	10.58	16.13	10.58	21.66	10.58	14.32	10.58	19.57	10.58
Prol - Rep 2	18.49	11.31	28.49	11.31	17.42	11.31	20.1	11.31	18.58	11.31	22.35	11.31	26.56	11.31	18.51	11.31	21.6	11.31	17.43	11.31	20.43	11.31	15.74	11.31	20.35	11.31
Prol - Rep 2	17.55	9.81	27.36	9.81	16.27	9.81	19.28	9.81	17.21	9.81	21.52	9.81	20.13	9.81	17.42	9.81	21.39	9.81	16.11	9.81	21.3	9.81	15.01	9.81	19.18	9.81
Prol - Rep 2	16.9	10.48	28.71	10.48	17.19	10.48	19.96	10.48	17.35	10.48	22.26	10.48	19.96	10.48	17.43	10.48	20.76	10.48	15.82	10.48	21.65	10.48	14.99	10.48	19.33	10.48
Prol - Rep 3	20.25	12.15	30.09	12.15	15.3	12.15	18.39	12.15	15.76	12.15	19.77	12.15	19.7	12.15	16.56	12.15	19.65	12.15	18.88	12.15	23.55	12.15	14.24	12.15	22.25	12.15
Prol - Rep 3	16.96	9.58	32.89	9.58	15.2	9.58	18.63	9.58	15.26	9.58	20.12	9.58	19.21	9.58	16.67	9.58	20.27	9.58	16.2	9.58	20.55	9.58	14.25	9.58	19.13	9.58
Prol - Rep 3	16.75	8.92	23.89	8.92	15.44	8.92	18.31	8.92	16.24	8.92	20.13	8.92	20.09	8.92	16.77	8.92	19.8	8.92	15.25	8.92	20.08	8.92	14.44	8.92	17.99	8.92
3d diff - Rep 1	25.36	11.59	29.01	11.29	17.48	11.29	19.28	11.29	19.82	11.29	22.92	11.29	19.65	11.29	16.95	11.29	21.85	11.29	18.65	11.29	18.31	11.29	16.43	11.29	20.91	11.29
3d diff - Rep 1	25.98	11.53	27.09	10.4	16.1	10.4	18.89	10.4	18.16	10.4	22.57	10.4	20.28	10.4	16.41	10.4	21.05	10.4	18.16	10.4	17.08	10.4	15.69	10.4	20.38	10.4
3d diff - Rep 1	23.86	9.61	27.69	10.62	16.32	10.62	18.81	10.62	19.55	10.62	22.87	10.62	19.98	10.62	16.94	10.62	21.59	10.62	18.5	10.62	18.46	10.62	16.16	10.62	20.39	10.62
3d diff - Rep 2	25.77	11.03	30.34	11.03	16.44	11.03	18.76	11.03	18.74	11.03	23.12	11.03	19.14	11.03	16.67	11.03	21.43	11.03	19.1	11.03	16.92	11.03	15.89	11.03	20.8	11.03
3d diff - Rep 2	26.22	10.4	28.61	10.4	16.43	10.4	18.71	10.4	18.8	10.4	22.77	10.4	18.67	10.4	16.3	10.4	21.73	10.4	18.46	10.4	17.05	10.4	15.49	10.4	20.27	10.4
3d diff - Rep 2	26.34	10.9	29.5	10.9	17.66	10.9	20.31	10.9	19.61	10.9	27.46	10.9	20.82	10.9	16.5	10.9	22.95	10.9	19.16	10.9	17.39	10.9	19.99	10.9	21.06	10.9
3d diff - Rep 3	22.93	10.3	26.88	10.3	16.96	10.3	19.02	10.3	18.83	10.3	22.25	10.3	18.78	10.3	15.87	10.3	20.12	10.3	18.37	10.3	17.67	10.3	15.49	10.3	19.76	10.3
3d diff - Rep 3	22.59	9.91	27.7	9.91	17.06	9.91	19.57	9.91	18.9	9.91	21.78	9.91	19.19	9.91	16.49	9.91	21.41	9.91	18.03	9.91	17.34	9.91	15.85	9.91	19.6	9.91
3d diff - Rep 3	22.65	9.98	28.22	9.98	15.63	9.98	19.22	9.98	18.19	9.98	22.42	9.98	18.79	9.98	15.63	9.98	19.86	9.98	18.21	9.98	17.13	9.98	15.33	9.98	19.57	9.98
5d diff - Rep 1	26.42	13.38	29.37	12.27	18.8	13.38	20.23	13.38	24.85	13.38	30.33	13.38	21.14	13.38	18.44	13.38	23.29	13.38	20.57	13.38	19.31	12.27	16.7	13.38	21.17	12.27
5d diff - Rep 1	26.17	11.91	29.05	11.73	18.09	11.91	19.6	11.91	20.6	11.91	23.15	11.91	19.81	11.91	17.31	11.91	22.01	11.91	19.6	11.91	19.2	11.73	15.77	11.91	20.2	11.73
5d diff - Rep 1	26.49	12.58	26.45	12.06	30.32	12.58	19.95	12.58	19.61	12.58	24.61	12.58	19.74	12.58	17.46	12.58	22.26	12.58	19.56	12.58	19.69	12.06	16.37	12.58	21.38	12.06
5d diff - Rep 2	22.67	11.17	26.65	11.17	15.82	11.17	17.63	11.17	18.22	11.17	23.4	11.17	18.87	11.17	16.74	11.17	21.66	11.17	18.89	11.17	19.78	11.17	16.41	12.27	20.23	11.17
5d diff - Rep 2	23.58	11.2	26.7	11.2	16.21	11.2	18.23	11.2	18.98	11.2	25.54	11.2	19.02	11.2	16.77	11.2	22.33	11.2	20.25	11.2	19.84	11.2	16.23	11.73	21.41	11.2
5d diff - Rep 2	23.62	10.72	26.42	10.72	16.34	10.72	17.58	10.72	18.6	10.72	23.65	10.72	18.62	10.72	16.76	10.72	22.14	10.72	19.31	10.72	19.43	10.72	16.76	12.06	20.43	10.72
5d diff - Rep 3	23.73	12.27	26.4	11.9	17.81	11.9	19.08	11.9	19.11	11.9	24.95	11.9	20.49	11.9	17.26	11.9	22.44	12.27	19.81	11.9	18.91	11.9	14.72	10.21	22.32	11.9
5d diff - Rep 3	24	11.73	26.99	11.59	18.2	11.59	19.01	11.59	19.05	11.59	25.24	11.59	18.68	11.59	17.01	11.59	22.31	11.73	20	11.59	18.81	11.59	15.72	11.1	22.14	11.59
5d diff - Rep 3	24.52	12.06	27.42	12.27	18.5	12.27	19.13	12.27	19.11	12.27	25.27	12.27	18.79	12.27	17.72	12.27	22.69	12.06	20.41	12.27	18.95	12.27	15.72	10.95	22.71	12.27
Brain - Rep 1	18.18	8.77	19.75	8.77	16.18	9.32	15.86	8.77	15.91	8.77	14.78	8.77	14.37	8.77	13.22	8.77	18.24	8.77	18.61	8.77	24.39	8.77	12.44	8.77	18.25	8.77
Brain - Rep 2	19.26	9.32	20.65	9.32	15.42	9.3	16.47	9.32	16.41	9.32	15.62	9.32	15.09	9.32	13.88	9.32	18.91	9.32	18.93	9.32	25.91	9.32	12.57	9.3	19.06	9.32
Brain - Rep 3	18.32	9.3	19.94	9.3	16.55	9.31	15.45	9.3	15.67	9.3	14.97	9.3	14.56	9.3	13.14	9.3	18.42	9.3	18.2	9.3	25.36	9.3	12.81	9.3	17.89	9.3
STANDARD CURVE DATA
Copy number	β-Actin	dio2 Ct	dio3 Ct	lat1 Ct	lat2 Ct	mct8 Ct	oatp1c1 Ct	trα1 Ct	trα2 Ct	trβ Ct	klf9 Ct	mobp Ct	ncor1 Ct	hr Ct
375	only standard curve equation available	23.37	23.6	24.93	24.61	24.1	21.95	22.55	21.76	19.34	20.7	27.23	17.06	25.36
3750		20.05	20.82	22.01	21.42	21.73	19.38	19.51	18.86	19.49	17.41	23.79	15.87	21.03
37500		16.25	16.87	18.78	17.69	18.25	16.2	16.1	15.36	15.76	14.15	20.98	14.07	17.42
375000		13.12	13.07	14.92	13.65	15.26	12.67	13.24	12.14	13.46	11.06	16.89	10.81	14.51
3750000		9.76	9.47	10.8	9.9	10.73	9.42	9.85	8.87	9.01	7.5	13.27	8.47	10.63
Standard Curve Equation	y = -1.413ln(x) + 29.577	y = -1.469ln(x) + 33.129	y = -1.564ln(x) + 33.237	y = -1.535ln(x) + 34.457	y = -1.615ln(x) + 34.465	y = -1.442ln(x) + 33.204	y = -1.38ln(x) + 30.456	y = -1.375ln(x) + 30.736	y = -1.411ln(x) + 30.264	y = -1.465ln(x) + 28.176	y = -1.422ln(x) + 29.144	y = -1.512ln(x) + 36.359	y = -0.966ln(x) + 23.429	y = -1.563ln(x) + 34.247
Sample	Conc T3	dio3 Ct	β-Actin Ct	Conc T4	dio3 Ct	β-Actin Ct
Prol - Rep 1	0 T3	24.78	10.41	0 T4	24.78	10.41
Prol - Rep 1	0 T3	24.73	10.69	0 T4	24.73	10.69
Prol - Rep 1	0 T3	25.53	10.58	0 T4	25.53	10.58
Prol - Rep 2	0 T3	28.49	11.31	0 T4	28.49	11.31
Prol - Rep 2	0 T3	27.36	9.81	0 T4	27.36	9.81
Prol - Rep 2	0 T3	28.71	10.48	0 T4	28.71	10.48
Prol - Rep 3	0 T3	30.09	12.15	0 T4	30.09	12.15
Prol - Rep 3	0 T3	32.89	9.58	0 T4	32.89	9.58
Prol - Rep 3	0 T3	23.89	8.92	0 T4	23.89	8.92
Prol - Rep 1	30 fM T3	26.28	11.19	30 fM T4	25.4	10.76
Prol - Rep 1	30 fM T3	24.67	10.25	30 fM T4	24.47	11.03
Prol - Rep 1	30 fM T3	25.19	10.89	30 fM T4	25.59	11.22
Prol - Rep 2	30 fM T3	27.89	10.25	30 fM T4	26.37	9.84
Prol - Rep 2	30 fM T3	27.29	9.76	30 fM T4	26.63	10.87
Prol - Rep 2	30 fM T3	25.95	9.91	30 fM T4	27.83	10.98
Prol - Rep 3	30 fM T3	25.1	9.76	30 fM T4	24.88	10.24
Prol - Rep 3	30 fM T3	25.35	8.98	30 fM T4	23.96	8.78
Prol - Rep 3	30 fM T3	29.77	9.14	30 fM T4	25.23	10.23
Prol - Rep 1	30 pM T3	24.81	11.45	30 pM T4	23.93	10.55
Prol - Rep 1	30 pM T3	25.16	11.23	30 pM T4	24.57	10.89
Prol - Rep 1	30 pM T3	25.06	10.68	30 pM T4	24.88	11
Prol - Rep 2	30 pM T3	26.57	9.47	30 pM T4	27.05	10.75
Prol - Rep 2	30 pM T3	32.07	10.89	30 pM T4	26.78	10.17
Prol - Rep 2	30 pM T3	23.9	9.74	30 pM T4	25.26	9.55
Prol - Rep 3	30 pM T3	23.62	8.83	30 pM T4	25.24	27.58
Prol - Rep 3	30 pM T3	24.62	9.39	30 pM T4	23.74	10.71
Prol - Rep 3	30 pM T3	23.42	9.56	30 pM T4	25.24	9.97
Prol - Rep 1	3 nM T3	23.27	10.61	30 nM T4	23.07	10.57
Prol - Rep 1	3 nM T3	24.32	11.34	30 nM T4	23.88	11.68
Prol - Rep 1	3 nM T3	25.2	12.85	30 nM T4	24.15	9.98
Prol - Rep 2	3 nM T3	23.91	9.55	30 nM T4	31.8	11.02
Prol - Rep 2	3 nM T3	31.58	9.94	30 nM T4	25.89	11.15
Prol - Rep 2	3 nM T3	26.1	10.1	30 nM T4	23.09	10.32
Prol - Rep 3	3 nM T3	24.98	11.69	30 nM T4	31.24	10.22
Prol - Rep 3	3 nM T3	30.57	10.24	30 nM T4	23.88	10.99
Prol - Rep 3	3 nM T3	24.87	12.09	30 nM T4	23.89	10.9
3d diff - Rep 1	0 T3	29.01	13.32	0 T4	29.01	13.32
3d diff - Rep 1	0 T3	27.09	12.27	0 T4	27.09	12.27
3d diff - Rep 1	0 T3	27.69	13.04	0 T4	27.69	13.04
3d diff - Rep 2	0 T3	30.34	13.43	0 T4	30.34	13.43
3d diff - Rep 2	0 T3	28.61	12.89	0 T4	28.61	12.89
3d diff - Rep 2	0 T3	29.5	13.52	0 T4	29.5	13.52
3d diff - Rep 3	0 T3	31.91	10.73	0 T4	31.91	10.73
3d diff - Rep 3	0 T3	30.29	10.4	0 T4	30.29	10.4
3d diff - Rep 3	0 T3	29.99	10.47	0 T4	29.99	10.47
3d diff - Rep 1	30 fM T3	26.39	13.26	30 fM T4	25.79	13.03
3d diff - Rep 1	30 fM T3	24.88	12.35	30 fM T4	26.86	12.82
3d diff - Rep 1	30 fM T3	26.63	12.81	30 fM T4	26.56	13.84
3d diff - Rep 2	30 fM T3	25.88	13.13	30 fM T4	28.46	12.6
3d diff - Rep 2	30 fM T3	27.71	13.03	30 fM T4	28.27	13.05
3d diff - Rep 2	30 fM T3	28.9	12.94	30 fM T4	29.45	15.19
3d diff - Rep 3	30 fM T3	28.66	10.67	30 fM T4	30.01	10.13
3d diff - Rep 3	30 fM T3	24.15	10.21	30 fM T4	30.09	10.49
3d diff - Rep 3	30 fM T3	28.56	10.13	30 fM T4	32.35	10.32
3d diff - Rep 1	30 pM T3	28.62	13.76	30 pM T4	24.67	12.37
3d diff - Rep 1	30 pM T3	27.61	13	30 pM T4	23.5	11.92
3d diff - Rep 1	30 pM T3	24.28	11.97	30 pM T4	25.36	13.03
3d diff - Rep 2	30 pM T3	29.11	15.56	30 pM T4	29.09	15.25
3d diff - Rep 2	30 pM T3	26.77	12.62	30 pM T4	27.05	30.54
3d diff - Rep 2	30 pM T3	26.04	13.28	30 pM T4	26.84	12.82
3d diff - Rep 3	30 pM T3	27.29	10.74	30 pM T4	27.96	10.29
3d diff - Rep 3	30 pM T3	24.1	10.31	30 pM T4	31.04	10.68
3d diff - Rep 3	30 pM T3	26.15	10.02	30 pM T4	27.8	10.21
3d diff - Rep 1	3 nM T3	21.29	13.54	30 nM T4	19.2	12.34
3d diff - Rep 1	3 nM T3	19.17	13.26	30 nM T4	20.5	12.93
3d diff - Rep 1	3 nM T3	21.89	15	30 nM T4	20.98	12.87
3d diff - Rep 2	3 nM T3	22.17	13.42	30 nM T4	20.52	13.12
3d diff - Rep 2	3 nM T3	30.5	12.75	30 nM T4	21.7	13.03
3d diff - Rep 2	3 nM T3	22.33	12.95	30 nM T4	24.4	15.42
3d diff - Rep 3	3 nM T3	20.58	10.04	30 nM T4	22.56	10.87
3d diff - Rep 3	3 nM T3	21.57	10.57	30 nM T4	21.17	10.78
3d diff - Rep 3	3 nM T3	21.41	10.31	30 nM T4	22.31	10.6
5d diff - Rep 1	0 T3	31.19	12.26	0 T4	31.19	12.26
5d diff - Rep 1	0 T3	30.48	11.45	0 T4	30.48	11.45
5d diff - Rep 1	0 T3	29.02	12.47	0 T4	29.02	12.47
5d diff - Rep 2	0 T3	26.38	13.1	0 T4	26.38	13.1
5d diff - Rep 2	0 T3	25.98	13.31	0 T4	25.98	13.31
5d diff - Rep 2	0 T3	29.22	13.61	0 T4	29.22	13.61
5d diff - Rep 3	0 T3	26.65	10.4	0 T4	26.65	10.4
5d diff - Rep 3	0 T3	26.7	10.61	0 T4	26.7	10.61
5d diff - Rep 3	0 T3	26.42	10.72	0 T4	26.42	10.72
5d diff - Rep 1	30 fM T3	30.44	13.81	30 fM T4	26.78	11.68
5d diff - Rep 1	30 fM T3	31.39	11.89	30 fM T4	27.81	11.53
5d diff - Rep 1	30 fM T3	32.86	11.28	30 fM T4	28.03	11.41
5d diff - Rep 2	30 fM T3	30.73	12.97	30 fM T4	23.67	13
5d diff - Rep 2	30 fM T3	22.09	12.08	30 fM T4	27.22	12.68
5d diff - Rep 2	30 fM T3	24.85	12.85	30 fM T4	24.5	13.82
5d diff - Rep 3	30 fM T3	25.28	10.87	30 fM T4	17.7	10.84
5d diff - Rep 3	30 fM T3	26.54	10.59	30 fM T4	17.56	10.64
5d diff - Rep 3	30 fM T3	25.56	11.22	30 fM T4	17.48	10.9
5d diff - Rep 1	30 pM T3	25.19	11.7	30 pM T4	26.7	11.41
5d diff - Rep 1	30 pM T3	25.3	11.13	30 pM T4	28.28	11.76
5d diff - Rep 1	30 pM T3	25.15	10.92	30 pM T4	27.94	11.01
5d diff - Rep 2	30 pM T3	27.47	12.96	30 pM T4	24.37	13.09
5d diff - Rep 2	30 pM T3	24.21	13.21	30 pM T4	24.9	12.87
5d diff - Rep 2	30 pM T3	22.76	12.54	30 pM T4	24.21	12.66
5d diff - Rep 3	30 pM T3	22.87	10.62	30 pM T4	26.97	10.8
5d diff - Rep 3	30 pM T3	23.26	10.98	30 pM T4	27.13	10.63
5d diff - Rep 3	30 pM T3	21.85	9.98	30 pM T4	25.85	11.07
5d diff - Rep 1	3 nM T3	20.46	11.37	30 nM T4	19.49	11.38
5d diff - Rep 1	3 nM T3	20.01	11.24	30 nM T4	18.06	11.29
5d diff - Rep 1	3 nM T3	19.65	11.57	30 nM T4	18.69	10.8
5d diff - Rep 2	3 nM T3	20.08	13.39	30 nM T4	18.21	13.76
5d diff - Rep 2	3 nM T3	31.15	13.11	30 nM T4	17.25	13.1
5d diff - Rep 2	3 nM T3	18.26	14.7	30 nM T4	19.32	30.48
5d diff - Rep 3	3 nM T3	17.7	10.84	30 nM T4	24.58	11.03
5d diff - Rep 3	3 nM T3	17.56	10.64	30 nM T4	25.25	10.66
5d diff - Rep 3	3 nM T3	17.48	10.9	30 nM T4	25.6	10.66

## Sheet: rCCC
Sample	Ppia Ct	DIO2 Ct	DIO3 Ct	LAT1 Ct	LAT2 Ct	MCT8 Ct	OATP1c1 Ct	TRα1 Ct	TRα2 Ct	TRβ Ct	Klf9 Ct	Mobp Ct	NCOR1 Ct	Hr Ct
DIV 2 Rep 1	13.7151	22.8465	26.1354	17.6507	21.887	19.9915	20.7392	18.4047	17.7647	22.5374	21.9384	25.4937	17.7591	22.1352
DIV 2 Rep 1	13.9234	22.125	25.7728	17.3034	21.4772	20.0856	21.0168	18.5673	17.8182	22.0837	21.9177	25.4722	17.3377	21.9668
DIV 2 Rep 1	13.804	22.573	26.2514	17.6392	21.6383	19.8474	20.9121	18.3099	17.9778	22.1566	21.6793	25.2861	17.5242	22.0558
DIV 2 Rep 2	13.3157	23.4515	24.972	16.5109	21.3508	19.6872	20.9334	17.6988	17.2478	21.5113	21.0179	25.6467	16.8371	21.9259
DIV 2 Rep 2	13.5803	23.1718	25.166	16.7829	20.799	19.3094	21.3139	17.6512	17.119	21.7301	21.5501	25.8272	16.6523	21.6725
DIV 2 Rep 2	13.7636	22.9479	24.7875	16.7013	21.0594	19.3293	20.7939	17.3398	17.5242	21.49	21.0409	25.9779	16.6387	21.7649
DIV 2 Rep 3	13.9507	23.0287	25.9059	17.4582	21.2157	19.9636	20.8558	17.5863	17.2925	21.9078	21.7017	27.8697	17.1151	21.6543
DIV 2 Rep 3	13.6047	23.4884	25.3792	17.5558	21.3572	19.7648	21.0785	17.3368	17.2498	21.7392	21.4413	27.5139	16.9734	21.6036
DIV 2 Rep 3	13.2321	22.5371	25.0444	17.6493	21.4062	19.6709	20.6849	17.9362	17.6793	21.7517	21.3813	27.5732	17.2916	21.8185
DIV 7 Rep 1	13.3413	21.5594	24.4946	17.3001	19.6073	19.9628	23.4904	17.5132	16.6219	20.048	19.7811	22.2594	17.1124	21.8835
DIV 7 Rep 1	13.798	21.5274	24.6759	17.9483	19.5014	19.967	24.4522	17.6688	17.2491	20.1054	20.3177	22.4703	17.1698	21.4635
DIV 7 Rep 1	13.3046	21.9193	24.3204	17.4291	19.6796	20.1167	23.6407	17.4849	17.0366	19.9774	19.9049	22.139	17.2145	21.7034
DIV 7 Rep 2	12.8182	23.6109	25.0583	17.1625	19.3608	19.4077	23.746	17.1389	16.1626	20.4791	20.189	23.0181	16.9862	21.8541
DIV 7 Rep 2	13.0361	23.3095	25.276	17.1396	19.6577	19.528	24.0915	16.9426	16.2581	20.0841	20.4287	23.0447	16.9044	21.8507
DIV 7 Rep 2	12.9568	23.3176	25.3052	17.3213	20.0969	19.3705	24.4303	17.4993	16.5348	20.0841	20.2631	23.1336	17.1208	22.1352
DIV 7 Rep 3	14.1355	24.3772	26.3412	17.4326	20.0355	20.474	26.782	17.6141	16.598	20.4285	20.2167	25.2173	17.1109	22.3398
DIV 7 Rep 3	13.8365	23.2944	26.2105	17.3643	19.9037	19.9001	23.9606	18.6619	17.1287	20.3893	20.4388	25.2227	17.2057	22.0818
DIV 7 Rep 3	13.6901	23.5267	25.3807	17.72	20.0255	20.0058	23.7631	17.4044	16.8857	20.4	20.4574	24.9738	17.3058	22.3469
DIV 21 Rep 1	13.9668	20.5298	27.2332	18.3066	18.0821	21.953	26.3769	19.2294	18.0977	20.34	19.2665	25.9845	17.5801	22.6715
DIV 21 Rep 1	14.0448	20.4893	28.0042	19.1175	18.0928	21.3505	25.7082	19.0409	17.8315	19.9842	19.3805	26.3147	17.76	22.4806
DIV 21 Rep 1	13.9507	19.9357	27.9389	17.7659	18.0937	21.5823	25.6311	19.2469	18.3602	19.8415	19.2223	26.4605	17.689	22.5948
DIV 21 Rep 2	14.2335	19.9864	28.5605	18.3018	18.6254	21.3794	24.0727	18.3559	18.0686	19.9958	19.1762	28.0927	17.1499	23.6111
DIV 21 Rep 2	14.318	20.1916	28.3807	18.6996	17.9334	21.8168	23.8361	18.7246	18.273	19.848	19.336	28.3097	16.834	23.4191
DIV 21 Rep 2	14.3018	19.9709	28.2448	18.5947	17.7446	21.2214	24.0951	18.9317	18.0934	19.7314	19.0505	27.9405	17.2843	23.6205
DIV 21 Rep 3	14.4733	19.1227	27.4185	18.7072	18.4887	22.0225	24.2928	19.1872	18.336	20.0569	18.8055	29.916	17.8043	22.1986
DIV 21 Rep 3	14.1759	19.621	28.0891	18.5953	18.6491	21.2397	23.5187	19.1974	18.1338	19.9402	18.9803	29.9851	17.4684	22.1845
DIV 21 Rep 3	14.2648	19.2484	28.0023	18.7327	18.8068	21.5498	23.304	19.1381	18.9777	20.1071	18.923	30.2719	17.8172	22.0618
Standard Curve Equation	y = -1.316ln(x) + 34.593	y = -1.607ln(x) + 40.247	y = -1.6ln(x) + 40.723	y = -1.621ln(x) + 39.915	y = -1.665ln(x) + 41.197	y = -1.3ln(x) + 34.411	y = -1.691ln(x) + 40.724	y = -2.122ln(x) + 50.807	y = -1.803ln(x) + 44.788	y = -1.446ln(x) + 36.451	y = -1.111ln(x) + 32.315	y = -1.258ln(x) + 34.657	y = -1.225ln(x) + 32.378	y = -1.669ln(x) + 56.51
1.5x10^8	10.2927	23.9269	10.3984	9.72994	9.94462	9.75254	9.57093	33.37	28.8607	10.0797	10.5086	10.0624	9.51408	24.9168
1.5x10^8	10.233	24.7304	10.2449	9.83732	10.0219	9.83407	9.59907	32.2591	29.8536	9.90855	10.6826	10.4072	9.69672	25.199
01:10:00	11.9404	22.0102	13.7745	12.7225	12.7785	13.219	11.4758	11.8868	11.6891	11.6058	14.8089	14.9442	11.455	28.9464
01:10:00	12.4337	21.5807	14.2238	12.8178	13.2378	13.9185	11.6065	12.4246	12.1903	11.5163	15.1332	15.4841	11.7313	29.3749
1:100	15.6371	16.9161	18.7159	15.9603	17.6734	14.9682	16.6895	14.3561	14.4593	16.0546	16.2814	16.3405	14.799	32.4751
1:100	16.1358	17.8272	19.4179	16.361	18.5768	15.5737	17.155	15.5065	14.7009	16.0271	16.315	16.8455	15.2119	32.3312
1:1000	18.8829	13.3061	20.9914	21.514	21.5425	18.595	20.6569	20.3784	18.2976	18.785	19.5987	18.6092	18.3908	36.2577
1:1000	19.375	13.6225	21.8341	21.5666	21.7871	19.2306	21.2816	21.1102	18.9287	18.997	19.7446	19.2891	18.0489	37.3175
1:10000	19.5489	10.0841	25.0784	24.3681	24.9516	22.1067	24.5444	22.7224	21.599	23.2698	21.1055	23.2925	20.2993	-
1:10000	18.7599	9.89529	24.9957	23.7529	24.6938	22.0647	24.1414	22.2424	20.9164	22.6771	20.9683	22.4064	20.4816	36.0906
Sample	[TH] nM	DIO3 Ct	Pgk1 Ct
DIV 2 Rep 1	0 T3	32.1858	24.0208
DIV 2 Rep 1	0 T3	31.738	24.1553
DIV 2 Rep 1	0 T3	31.5527	23.2792
DIV 2 Rep 2	0 T3	27.9613	24.0656
DIV 2 Rep 2	0 T3	27.6682	23.6917
DIV 2 Rep 2	0 T3	27.464	23.5922
DIV 2 Rep 1	0.3 T3	31.1751	24.5909
DIV 2 Rep 1	0.3 T3	-	24.5281
DIV 2 Rep 1	0.3 T3	32.6329	24.6205
DIV 2 Rep 2	0.3 T3	30.0533	27.2543
DIV 2 Rep 2	0.3 T3	30.1785	27.546
DIV 2 Rep 2	0.3 T3	30.2344	27.3101
DIV 2 Rep 1	3 T3	31.6057	23.114
DIV 2 Rep 1	3 T3	31.9656	23.4797
DIV 2 Rep 1	3 T3	32.0598	23.3414
DIV 2 Rep 2	3 T3	27.8914	24.3811
DIV 2 Rep 2	3 T3	28.1228	24.4172
DIV 2 Rep 2	3 T3	27.8836	24.436
DIV 2 Rep 1	30 T3	31.3962	23.0107
DIV 2 Rep 1	30 T3	31.8051	22.9095
DIV 2 Rep 1	30 T3	30.9591	22.5025
DIV 2 Rep 2	30 T3	33.2045	-
DIV 2 Rep 2	30 T3	33.3569	-
DIV 2 Rep 2	30 T3	33.4373	-
DIV 7 Rep 1	0 T3	30.7764	23.1072
DIV 7 Rep 1	0 T3	31.1474	22.7956
DIV 7 Rep 1	0 T3	31.3768	22.9348
DIV 7 Rep 2	0 T3	28.4579	23.9373
DIV 7 Rep 2	0 T3	29.6255	23.6171
DIV 7 Rep 2	0 T3	28.4173	23.7825
DIV 7 Rep 1	0.3 T3	30.9292	24.2724
DIV 7 Rep 1	0.3 T3	31.9341	26.0084
DIV 7 Rep 1	0.3 T3	30.982	24.2395
DIV 7 Rep 2	0.3 T3	28.9963	24.4857
DIV 7 Rep 2	0.3 T3	30.2259	24.3444
DIV 7 Rep 2	0.3 T3	28.9057	24.2613
DIV 7 Rep 1	3 T3	30.9598	22.7524
DIV 7 Rep 1	3 T3	30.9859	22.7881
DIV 7 Rep 1	3 T3	31.3313	25.7853
DIV 7 Rep 2	3 T3	28.3749	23.5872
DIV 7 Rep 2	3 T3	29.0197	23.97
DIV 7 Rep 2	3 T3	28.6086	23.7146
DIV 7 Rep 1	30 T3	30.5341	22.8533
DIV 7 Rep 1	30 T3	31.2422	23.2202
DIV 7 Rep 1	30 T3	30.8236	22.6456
DIV 7 Rep 2	30 T3	28.6584	24.3265
DIV 7 Rep 2	30 T3	28.4733	24.1009
DIV 7 Rep 2	30 T3	28.6576	23.9805
DIV 21 Rep 1	0 T3	31.0333	22.6247
DIV 21 Rep 1	0 T3	30.4608	22.2657
DIV 21 Rep 1	0 T3	30.9849	22.2742
DIV 21 Rep 2	0 T3	25.9973	23.8624
DIV 21 Rep 2	0 T3	25.5542	22.9693
DIV 21 Rep 2	0 T3	25.2956	23.0117
DIV 21 Rep 1	0.3 T3	-	22.4142
DIV 21 Rep 1	0.3 T3	31.5645	22.1997
DIV 21 Rep 1	0.3 T3	32.9191	22.2945
DIV 21 Rep 2	0.3 T3	25.079	23.1201
DIV 21 Rep 2	0.3 T3	25.3312	23.082
DIV 21 Rep 2	0.3 T3	25.355	23.3087
DIV 21 Rep 1	3 T3	32.2973	22.979
DIV 21 Rep 1	3 T3	32.5423	23.0692
DIV 21 Rep 1	3 T3	32.0038	22.7247
DIV 21 Rep 2	3 T3	27.7969	23.9035
DIV 21 Rep 2	3 T3	27.911	24.2296
DIV 21 Rep 2	3 T3	27.7731	23.9213
DIV 21 Rep 1	30 T3	31.9694	22.5575
DIV 21 Rep 1	30 T3	32.2132	21.4186
DIV 21 Rep 1	30 T3	32.6249	22.134
DIV 21 Rep 2	30 T3	25.0369	23.4399
DIV 21 Rep 2	30 T3	25.2254	23.4472
DIV 21 Rep 2	30 T3	24.8956	23.0182
DIV 2 Rep 1	0 T4	32.6932	24.8043
DIV 2 Rep 1	0 T4	32.495	25.2461
DIV 2 Rep 1	0 T4	32.0583	24.338
DIV 2 Rep 2	0 T4	31.3403	25.0925
DIV 2 Rep 2	0 T4	31.1677	24.3925
DIV 2 Rep 2	0 T4	31.4624	24.4507
DIV 2 Rep 1	0.3 T4	31.6046	25.0241
DIV 2 Rep 1	0.3 T4	32.6912	25.6067
DIV 2 Rep 1	0.3 T4	31.9195	25.1228
DIV 2 Rep 2	0.3 T4	30.6424	25.1783
DIV 2 Rep 2	0.3 T4	30.4693	25.1977
DIV 2 Rep 2	0.3 T4	30.6857	25.2667
DIV 2 Rep 1	3 T4	32.8644	24.4923
DIV 2 Rep 1	3 T4	32.7993	24.3165
DIV 2 Rep 1	3 T4	32.1935	24.7633
DIV 2 Rep 2	3 T4	32.7687	23.9442
DIV 2 Rep 2	3 T4	32.6967	24.0158
DIV 2 Rep 2	3 T4	31.9064	24.1363
DIV 2 Rep 1	30 T4	31.2108	24.0756
DIV 2 Rep 1	30 T4	32.0673	24.5994
DIV 2 Rep 1	30 T4	34.7324	24.4173
DIV 2 Rep 2	30 T4	31.0748	23.7614
DIV 2 Rep 2	30 T4	31.2813	23.722
DIV 2 Rep 2	30 T4	30.9288	23.1926
DIV 7 Rep 1	0 T4	32.9441	25.1045
DIV 7 Rep 1	0 T4	32.7072	24.8109
DIV 7 Rep 1	0 T4	32.765	24.5065
DIV 7 Rep 2	0 T4	31.4387	23.7574
DIV 7 Rep 2	0 T4	30.5812	23.5865
DIV 7 Rep 2	0 T4	30.1524	23.3905
DIV 7 Rep 1	0.3 T4	31.8131	25.0589
DIV 7 Rep 1	0.3 T4	32.1496	25.452
DIV 7 Rep 1	0.3 T4	32.4294	25.7958
DIV 7 Rep 2	0.3 T4	31.064	23.9309
DIV 7 Rep 2	0.3 T4	30.9757	23.9553
DIV 7 Rep 2	0.3 T4	30.9991	23.9417
DIV 7 Rep 1	3 T4	32.0857	24.8202
DIV 7 Rep 1	3 T4	32.5322	24.9116
DIV 7 Rep 1	3 T4	32.1229	24.4752
DIV 7 Rep 2	3 T4	31.0346	24.365
DIV 7 Rep 2	3 T4	31.315	24.5566
DIV 7 Rep 2	3 T4	31.3788	24.2924
DIV 7 Rep 1	30 T4	31.0352	24.0126
DIV 7 Rep 1	30 T4	30.9163	24.4469
DIV 7 Rep 1	30 T4	30.8527	24.8448
DIV 7 Rep 2	30 T4	30.5318	24.0012
DIV 7 Rep 2	30 T4	30.782	23.8559
DIV 7 Rep 2	30 T4	30.6445	23.8074
DIV 21 Rep 1	0 T4	31.0268	24.24
DIV 21 Rep 1	0 T4	31.4406	24.2179
DIV 21 Rep 1	0 T4	31.0237	25.1794
DIV 21 Rep 2	0 T4	32.5581	24.1195
DIV 21 Rep 2	0 T4	32.2689	23.4674
DIV 21 Rep 2	0 T4	31.9082	23.5137
DIV 21 Rep 1	0.3 T4	32.9156	24.3461
DIV 21 Rep 1	0.3 T4	33.0063	24.2669
DIV 21 Rep 1	0.3 T4	32.5135	24.3163
DIV 21 Rep 2	0.3 T4	32.4058	23.6538
DIV 21 Rep 2	0.3 T4	32.0789	23.8042
DIV 21 Rep 2	0.3 T4	31.9427	23.755
DIV 21 Rep 1	3 T4	35.0385	25.0192
DIV 21 Rep 1	3 T4	33.3546	25.4244
DIV 21 Rep 1	3 T4	33.3141	25.702
DIV 21 Rep 2	3 T4	32.4093	23.9252
DIV 21 Rep 2	3 T4	32.3211	23.9274
DIV 21 Rep 2	3 T4	33.1577	23.9188
DIV 21 Rep 1	30 T4	32.0116	25.5863
DIV 21 Rep 1	30 T4	33.5471	25.515
DIV 21 Rep 1	30 T4	31.5207	26.1256
DIV 21 Rep 2	30 T4	31.1559	22.4328
DIV 21 Rep 2	30 T4	30.7204	22.5949
DIV 21 Rep 2	30 T4	31.5013	22.3699

## Sheet: rCortex
Sample	Ppia Ct	DIO2 Ct	DIO3 Ct	LAT1 Ct	LAT2 Ct	MCT8 Ct	OATP1c1 Ct	TRα1 Ct	TRα2 Ct	TRβ Ct	Klf9 Ct	NCOR1 Ct	Mobp Ct	Hr Ct
PND 0-1	14.1759	23.204	24.6597	19.3504	20.9802	19.2808	19.7216	17.8695	16.4132	22.1411	22.9666	18.0401	30.8322	23.3737
PND 0-1	13.9863	23.2635	23.4563	19.3845	20.6847	19.4377	20.563	17.9255	16.6675	22.2185	23.2314	17.9967	30.8643	23.5807
PND 0-1	14.1507	23.3389	24.041	19.142	19.9233	19.6961	19.9328	17.7576	16.4397	21.7856	22.8966	18.2038	30.9053	23.7051
PND 0-2	13.2983	23.3132	24.0746	19.522	19.6553	19.6019	20.7151	17.9348	16.6919	22.3899	21.0389	17.0424	29.4745	23.5881
PND 0-2	13.7082	22.8848	24.0083	19.2948	20.2163	19.526	21.04	17.5521	16.645	22.0275	20.9708	17.1592	29.4146	23.902
PND 0-2	13.8303	23.3981	23.3495	19.2668	20.5258	19.6019	20.088	17.2639	16.5267	22.4995	21.1358	17.1054	29.0133	23.8494
PND 0-3	14.2677	22.9132	24.6261	19.9724	20.5662	19.9825	19.514	17.6243	16.6606	22.168	23.1745	17.7414	30.0313	23.33
PND 0-3	13.8894	23.1818	23.837	19.3935	20.2492	20.8109	19.6434	17.3868	17.1205	21.7077	23.1025	17.5512	30.5411	23.5184
PND 0-3	13.971	22.7842	24.6067	19.8899	20.6702	20.4024	19.7316	17.0223	16.694	21.7437	22.9066	17.8306	30.7136	23.6478
PND 7-1	13.8267	21.1421	25.6252	20.2823	20.003	20.3695	18.557	17.0684	16.0855	20.4758	20.6022	17.7288	25.5625	21.9969
PND 7-1	13.8741	21.0422	25.0182	19.5822	19.461	19.9647	19.2227	17.6249	16.3815	20.3597	20.6038	17.9367	25.2506	21.9662
PND 7-1	13.805	20.8677	25.8005	20.2882	19.7002	19.9697	18.9653	18.0297	16.3694	20.2771	20.5182	17.9132	25.2988	21.7402
PND 7-2	13.9612	20.8692	25.7679	19.0978	18.32	20.2899	18.2327	17.3576	16.7118	20.3389	20.488	17.5764	25.1254	22.3742
PND 7-2	13.8427	20.569	25.2056	19.405	19.489	20.2057	18.7286	17.507	16.9883	20.2504	20.1316	17.5602	24.6811	22.3137
PND 7-2	14.1245	21.0694	25.446	19.7762	19.0619	20.0297	18.3694	17.216	16.6434	20.0819	20.5071	17.6162	24.9938	22.1586
PND 7-3	14.0803	21.1702	26.5094	20.6571	19.567	20.0402	18.6979	17.4728	16.6444	20.3572	20.4465	17.8543	24.6012	21.9927
PND 7-3	13.9013	21.7024	25.8948	20.2078	19.6317	20.6453	18.9781	17.6573	16.6819	20.3679	20.5719	17.9245	23.6262	21.8205
PND 7-3	13.6046	21.0766	26.5358	20.5085	19.9536	20.5602	18.7203	17.6085	16.6771	20.4841	20.2686	17.91	24.2293	22.1556
Standard Curve Equation		y = -1.579ln(x) + 42.383	y = -1.596ln(x) + 42.893	y = -1.695ln(x) + 43.568	y = -1.655ln(x) + 42.934	y = -1.295ln(x) + 35.907	y = -1.596ln(x) + 41.517	y = -1.656ln(x) + 45.484	y = -1.798ln(x) + 47.929	y = -1.454ln(x) + 38.521	y = -1.087ln(x) + 33.366	y = -1.248ln(x) + 34.762	y = -1.253ln(x) + 36.296	y = -1.72ln(x) + 60.049
Dilution
1.5x10^8	10.5581	10.1652	10.292	9.02142	9.01256	9.36092	9.54296	32.7547	29.2335	9.53865	10.4634	9.57373	10.2846	24.8579
1.5x10^8	10.6704	10.2368	10.4613	9.07436	9.15771	9.74634	9.59666	33.9645	29.8168	9.62525	10.7268	9.55553	10.4742	25.1306
01:10:00	12.3535	12.7025	13.1663	12.2419	12.1714	12.7775	11.127	11.5858	12.0562	11.0142	14.1271	11.4115	14.4103	28.6532
01:10:00	12.7366	13.831	13.963	27.6379	12.2828	12.4275	11.7871	11.8933	12.4337	11.5274	14.8043	11.8541	14.8052	28.9305
1:100	16.2706	16.763	18.097	15.767	17.1016	14.3261	16.0833	14.7763	14.6903	15.0911	15.8286	14.6414	15.5338	32.0361
1:100	16.6554	18.5504	18.2578	16.3732	17.8547	15.5615	16.7852	14.974	14.96	16.15	15.6761	15.0255	16.2024	33.2505
1:1000	19.6519	21.8438	21.2239	21.0137	21.1727	18.203	19.7415	20.115	18.7911	18.2247	19.0753	18.1583	18.49	38.3318
1:1000	19.2919	21.5089	20.6208	21.918	21.2511	18.5119	20.8066	20.1895	19.2527	18.2742	19.4052	18.7525	18.9816	35.4964
1:10000	19.6846	24.0229	25.0049	24.7857	23.8721	21.6761	24.2351	22.7955	21.9027	23.0653	20.8792	20.481	23.1118	37.8147
1:10000	19.2888	24.317	25.1469	23.7072	23.4277	21.4919	22.8332	22.5845	21.4488	22.5898	20.5694	20.5672	22.3631	-

## Sheet: Zebrafish
Sample	β-Actin Ct	DIO3a Ct	DIO3b Ct	DIO2 Ct	KLF9 Ct	LAT1	LAT2	MBPa Ct	MCT8 Ct	NCOR1 Ct	OATP1c1 Ct	TRα-a Ct	TRα-b Ct	TRβ Ct
Standard curve - 150 mol/ul	29.341	30.594	28.793	32.604	31.743	29.657	31.35	32.265	33.121	29.102	30.604	31.562	31.25	22.396
Standard curve - 150 mol/ul	27.876	29.982	33.275	32.308	31.706	31.337	30.083	28.409	32.841	30.264	30.815	25.115	30.905	33.798
Standard curve - 150 mol/ul	28.586	28.802	32.265	32.269	31.155	32.463	28.791	30.106	33.789	27.719	26.818	27.471	27.513	28.1
Standard curve - 1500 mol/ul	26.172	28.01	28.598	26.051	27.668	25.766	27.262	25.979	25.91	26.353	26.291	23.813	24.263	22.942
Standard curve - 1500 mol/ul	26.353	26.481	29.472	25.665	27.002	25.452	26.329	26.237	25.088	24.967	24.958	25.391	23.607	24.908
Standard curve - 1500 mol/ul	25.655	27.728	27.121	25.524	26.072	25.587	26.566	27.329	25.67	25.459	22.987	23.457	26.399	23.444
Standard curve - 15000 mol/ul	22.428	23.035	24.852	22.472	22.87	21.777	23.081	22.265	22.203	22.558	21.933	20.536	21.243	19.89
Standard curve - 15000 mol/ul	22.793	22.676	23.932	21.847	21.916	22.042	22.102	20.209	22.952	22.965	21.251	20.189	21.076	19.641
Standard curve - 15000 mol/ul	21.826	23.438	23.534	22.315	23.03	20.566	22.631	21.506	22.264	21.377	21.769	20.485	20.712	20.737
Standard curve - 150000 mol/ul	19.672	19.615	20.67	18.406	19.291	18.579	19.132	18.62	18.758	18.054	18.394	17.183	17.742	16.806
Standard curve - 150000 mol/ul	20.035	19.495	20.315	18.439	19.232	18.349	18.489	18.094	16.16	18.217	17.773	16.497	17.609	16.16
Standard curve - 150000 mol/ul	20.695	16.745	20.482	18.269	18.758	18.084	18.737	18.231	18.092	18.502	17.968	16.795	17.825	16.273
Standard curve - 1500000 mol/ul	15.982	16.187	18.169	14.958	15.57	14.771	15.026	14.738	14.88	14.342	14.422	13.511	14.046	13.288
Standard curve - 1500000 mol/ul	16.398	15.783	17.759	14.736	15.604	14.86	14.979	14.684	14.444	14.654	14.548	13.116	14.143	13.044
Standard curve - 1500000 mol/ul	17.315	16.453	18.015	14.581	15.648	15.292	15.285	15.111	15.865	14.43	14.652	13.753	14.519	13.304
Standard curve - 15000000 mol/ul	12.352	10.409	13.139	10.679	11.753	11.228	11.81	11.566	11.275	10.21	10.512	10.525	10.979	9.974
Standard curve - 15000000 mol/ul	12.788	10.756	13.05	10.786	11.666	11.316	11.568	11.247	11.167	10.194	10.403	9.76	10.522	9.159
Standard curve - 15000000 mol/ul	12.422	11.127	13.28	11.014	12.107	11.79	11.567	11.467	11.92	10.386	10.891	10.357	11.117	9.978
Standard curve equations to calculate copy number	y = -1.379 ln(x) + 35.9	y = -1.655ln(x) + 38.781	y = -1.567 ln(x) + 39.47	y = -1.795 ln(x) + 40.03	y = -1.686 ln(x) + 39.422	y = -1.657 ln(x) + 38.338	y = -1.623 ln(x) + 38.3	y = -1.64 ln(x) + 38.108	y = -1.547 ln(x) + 36.877	y = -1.628 ln(x) + 37.518	y = -1.592 ln(x) + 36.97	y = -1.551 ln(x) + 35.567	y = -1.612 ln(x) + 37.106	y = -1.52 ln(x) + 34.753
Sample	β-Actin Ct	DIO3a Ct	DIO3b Ct	DIO2 Ct	KLF9 Ct	LAT1	LAT2	MBPa Ct	MCT8 Ct	NCOR1 Ct	OATP1c1 Ct	TRα-a Ct	TRα-b Ct	TRβ Ct
Time Points - Untreated Samples
18 hpf - rep1	14.748	26.692	24.834	30.439	25.828	23.533	20.981	26.975	24.222	20.79	24.524	21.788	24.2	21.773
18 hpf - rep1	14.537	26.641	24.948	29.685	24.578	23.525	20.957	26.756	23.988	20.842	23.958	21.418	24.294	22.163
18 hpf - rep1	14.816	26.525	25.03	29.715	24.942	23.416	20.984	26.819	23.967	20.81	23.799	21.709	24.269	22.182
18 hpf - rep2	14.232	26.832	24.889	31.542	24.428	23.63	20.863	26.709	23.499	19.717	23.632	22.086	24.653	23.113
18 hpf - rep2	13.753	26.626	24.8	31.711	24.487	23.434	20.948	26.457	23.549	21.027	23.518	22.152	24.607	23.152
18 hpf - rep2	14.079	26.463	24.875	31.903	24.744	23.154	20.937	26.305	23.749	22.251	23.47	22.23	24.504	23.473
18 hpf - rep3	13.905	26.31	24.849	29.775	24.724	23.202	20.573	26.863	23.832	20.951	24.445	22.026	24.911	23.204
18 hpf - rep3	13.899	26.82	24.922	29.964	24.242	23.543	21.236	26.873	23.747	19.109	24.007	21.988	24.64	22.981
18 hpf - rep3	13.902	26.539	24.967	29.914	24.186	23.517	21.258	26.731	23.321	19.022	24.071	21.959	24.562	22.896
24 hpf - rep1	14.126	26.057	25.134	29.522	26.006	22.014	20.726	25.972	23.402	20.308	23.605	21.602	23.497	21.531
24 hpf - rep1	13.997	26.01	25.27	29.043	25.31	21.962	20.751	25.531	22.937	20.564	22.975	21.429	23.717	21.572
24 hpf - rep1	14.135	25.952	25.233	29.106	25.476	21.846	20.864	25.879	23.22	20.212	22.855	21.505	23.562	21.703
24 hpf - rep2	14.043	26.007	24.707	29.87	25.531	21.862	20.962	26.277	23.135	21.993	22.842	21.85	24.158	23.117
24 hpf - rep2	14.188	26.015	24.779	29.452	25.361	21.995	20.729	26.22	23.288	21.39	22.912	21.648	24.331	22.961
24 hpf - rep2	14.014	25.986	24.858	29.965	25.278	21.928	21.124	26.425	23.168	20.892	22.987	21.941	24.226	23.048
24 hpf - rep3	14.479	25.954	24.141	29.04	25.222	21.829	20.875	26.462	22.692	19.309	22.81	21.804	24.166	23.004
24 hpf - rep3	14.141	26.251	24.56	29.243	25.242	22.102	20.711	26.346	22.941	19.268	22.829	21.58	23.93	22.667
24 hpf - rep3	14.199	25.995	24.307	29.024	25.053	21.742	20.91	26.378	22.983	19.379	22.571	21.798	23.865	22.646
72 hpf - rep1	13.988	23.819	23.358	26.884	21.272	20.455	20.477	20.557	22.899	20.509	22.737	20.692	21.444	21.834
72 hpf - rep1	13.841	23.974	23.185	26.592	20.039	20.433	20.159	20.274	22.607	20.478	21.871	20.732	21.695	22.078
72 hpf - rep1	13.915	24.069	23.109	26.613	19.798	20.35	20.24	20.647	22.942	20.563	21.913	20.944	21.434	22.311
72 hpf - rep2	14.384	24.22	23.787	27.986	20.802	20.355	20.967	21.039	22.827	21.357	22.373	21.334	22.248	23.91
72 hpf - rep2	14.383	24.199	23.686	27.358	20.588	20.518	20.528	21.034	22.54	21.049	22.174	20.989	22.292	23.292
72 hpf - rep2	14.229	24.11	23.619	27.426	20.865	20.204	20.851	20.987	22.758	20.708	22.286	21.172	22.164	23.95
72 hpf - rep3	14.543	24.207	23.885	27.43	22.285	21.184	20.897	21.33	22.84	20.75	22.425	21.395	22.413	24.202
72 hpf - rep3	14.271	23.873	23.523	26.658	21.379	20.821	20.465	21.105	22.672	20.28	22.43	21.406	21.97	23.779
72 hpf - rep3	14.137	23.506	22.978	26.27	21.367	20.186	20.332	20.755	22.422	20.184	22.131	20.869	22.024	23.601
120 hpf - rep1	13.872	23.985	23.734	27.203	21.06	20.818	20.598	19.189	23.066	20.79	23.327	20.846	21.403	22.919
120 hpf - rep1	14.005	23.765	23.7	26.723	20.271	20.847	20.375	18.813	22.921	20.904	22.652	20.721	21.331	22.882
120 hpf - rep1	14.2	24.001	23.582	26.788	20.355	20.838	20.5	19.18	23.118	20.722	22.681	20.913	21.42	22.838
120 hpf - rep2	14.436	23.588	23.649	27.06	19.229	21.455	20.383	19.494	23.396	20.729	22.801	21.119	22.194	23.997
120 hpf - rep2	14.233	23.004	22.972	26.82	19.089	20.744	20.002	19.423	23.226	20.856	22.526	20.845	21.934	23.645
120 hpf - rep2	14.801	23.46	23.654	28.001	19.416	21.313	20.626	19.562	23.202	21.291	22.832	21.366	22.099	24.139
120 hpf - rep3	14.113	24.151	23.176	27.251	19.835	21.135	20.091	19.122	22.838	19.831	22.623	21.084	21.592	23.683
120 hpf - rep3	13.856	23.792	23.157	27.299	19.817	20.723	20.315	18.994	22.863	19.786	22.514	20.98	21.493	23.825
120 hpf - rep3	13.988	23.568	23.174	27.268	19.84	20.771	20.434	18.979	22.826	19.835	22.601	21.085	21.551	23.898
Sample	β-Actin Ct	DIO3a Ct	DIO3b Ct	DIO2 Ct	KLF9 Ct	LAT1	LAT2	MBPa Ct	MCT8 Ct	NCOR1 Ct	OATP1c1 Ct	TRα-a Ct	TRα-b Ct	TRβ Ct
T4 and T3 treated samples
24hpf EM - rep1	13.693		24.102
24hpf EM - rep2	13.849		24.4
24hpf EM - rep3	13.749		23.946
24hpf 10 nM T3 - rep1	13.773		23.981
24hpf 10 nM T3 - rep2	14.031		24.344
24hpf 10 nM T3 - rep3	13.752		23.963
24hpf 10 nM T4 - rep1	13.636		23.698
24hpf 10 nM T4 - rep2	13.798		23.985
24hpf 10 nM T4 - rep3	14.092		24.024
24hpf 30 nM T3 - rep1	13.788		23.914
24hpf 30 nM T3 - rep2	13.988		24.166
24hpf 30 nM T3 - rep3	13.839		23.978
24hpf 30 nM T4 - rep1	13.627		23.825
24hpf 30 nM T4 - rep2	13.808		23.878
24hpf 30 nM T4 - rep3	13.926		23.831
24hpf 100 nM T3 - rep1	13.744		23.843
24hpf 100 nM T3 - rep2	13.833		23.864
24hpf 100 nM T3 - rep3	13.866		23.678
24hpf 100 nM T4 - rep1	13.661		23.316
24hpf 100 nM T4 - rep2	14.098		23.752
24hpf 100 nM T4 - rep3	13.982		23.493
24hpf 300 nM T3 - rep1	13.783		23.296
24hpf 300 nM T3 - rep2	13.808		23.25
24hpf 300 nM T3 - rep3	14.077		23.895
24hpf 300 nM T4 - rep1	13.873		22.303
24hpf 300 nM T4 - rep2	13.631		23.349
24hpf 300 nM T4 - rep3	13.846		23.191
72hpf EM - rep1	13.937		24.102
72hpf EM - rep2	13.977		24.4
72hpf EM - rep3	13.884		23.946
72hpf 10 nM T3 - rep1	13.781		22.204
72hpf 10 nM T3 - rep2	13.6		22.728
72hpf 10 nM T3 - rep3	13.744		21.975
72hpf 10 nM T4 - rep1	14.162		21.543
72hpf 10 nM T4 - rep2	13.366		21.818
72hpf 10 nM T4 - rep3	13.585		21.917
72hpf 30 nM T3 - rep1	13.866		22.098
72hpf 30 nM T3 - rep2	13.591		21.686
72hpf 30 nM T3 - rep3	13.865		21.674
72hpf 30 nM T4 - rep1	14.076		21.456
72hpf 30 nM T4 - rep2	12.995		20.403
72hpf 30 nM T4 - rep3	13.51		21.777
72hpf 100 nM T3 - rep1	14.008		21.237
72hpf 100 nM T3 - rep2	13.773		21.082
72hpf 100 nM T3 - rep3	13.905		21.129
72hpf 100 nM T4 - rep1	14.025		20.414
72hpf 100 nM T4 - rep2	13.309		20.028
72hpf 100 nM T4 - rep3	13.773		20.633
72hpf 300 nM T3 - rep1	14.061		20.619
72hpf 300 nM T3 - rep2	13.214		19.836
72hpf 300 nM T3 - rep3	13.353		21.546
72hpf 300 nM T4 - rep1	13.847		19.413
72hpf 300 nM T4 - rep2	12.924		19.387
72hpf 300 nM T4 - rep3	12.904		19.586
120hpf EM - rep1	14.344		23.137
120hpf EM - rep2	13.748		22.357
120hpf EM - rep3	13.901		22.027
120hpf 10 nM T3 - rep1	14.035		21.587
120hpf 10 nM T3 - rep2	13.626		22.066
120hpf 10 nM T3 - rep3	13.638		21.444
120hpf 10 nM T4 - rep1	14.035		21.013
120hpf 10 nM T4 - rep2	13.626		21.649
120hpf 10 nM T4 - rep3	13.638		21.346
120hpf 30 nM T3 - rep1	14.166		21.133
120hpf 30 nM T3 - rep2	13.709		21.009
120hpf 30 nM T3 - rep3	13.555		20.639
120hpf 30 nM T4 - rep1	13.841		20.087
120hpf 30 nM T4 - rep2	13.892		20.704
120hpf 30 nM T4 - rep3	14.157		21.327
120hpf 100 nM T3 - rep1	13.758		19.954
120hpf 100 nM T3 - rep2	13.461		20.01
120hpf 100 nM T3 - rep3	13.595		19.777
120hpf 100 nM T4 - rep1	13.754		19.012
120hpf 100 nM T4 - rep2	13.509		19.538
120hpf 100 nM T4 - rep3	13.488		19.078
